# Supplementary material for: Large-scale copy number analysis reveals variations in genes not previously associated with malignant pleural mesothelioma
Source: PubMed Central journal article supplement (PMC5768355; doi:10.18632/oncotarget.22817), 2017-12-01
Supplement: oncotarget-08-113673-s001.pdf [file oncotarget-08-113673-s001.pdf]

# Large-scale copy number analysis reveals variations in genes not previously associated with malignant pleural mesothelioma

## SUPPLEMENTARY MATERIALS

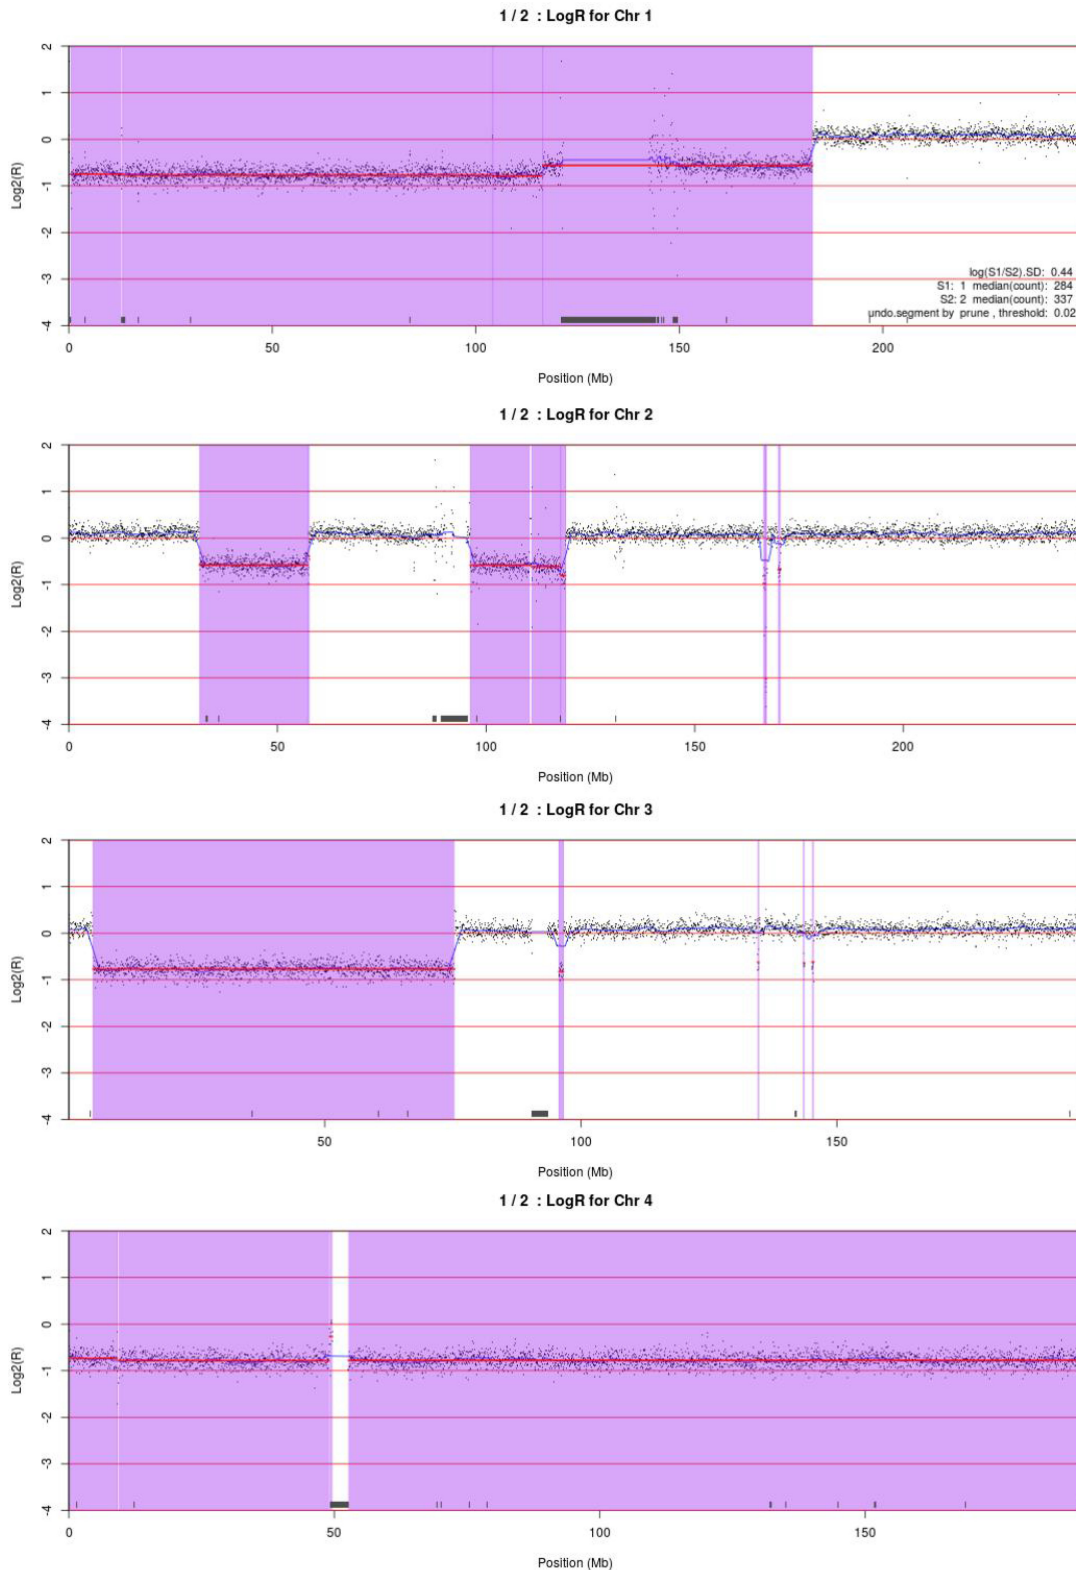

1 / 2 : LogR for Chr 5

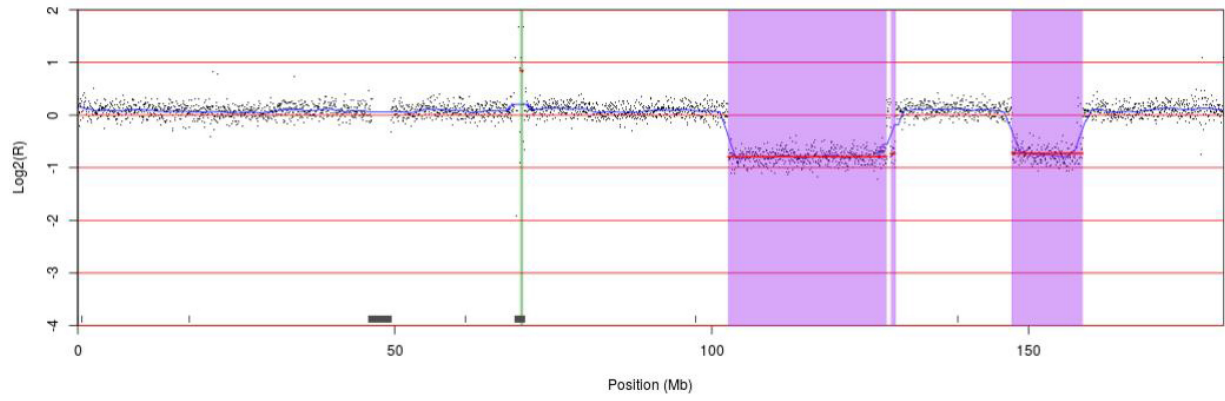

1 / 2 : LogR for Chr 6

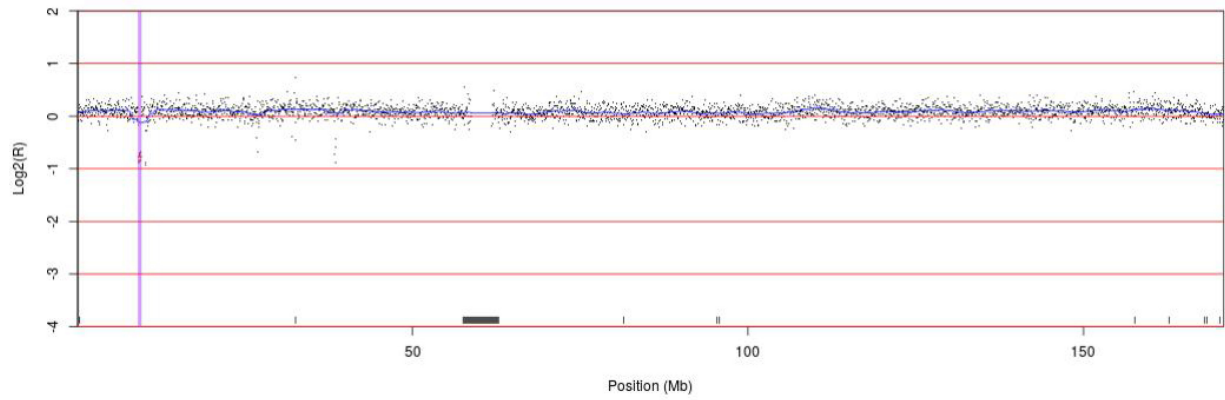

1 / 2 : LogR for Chr 7

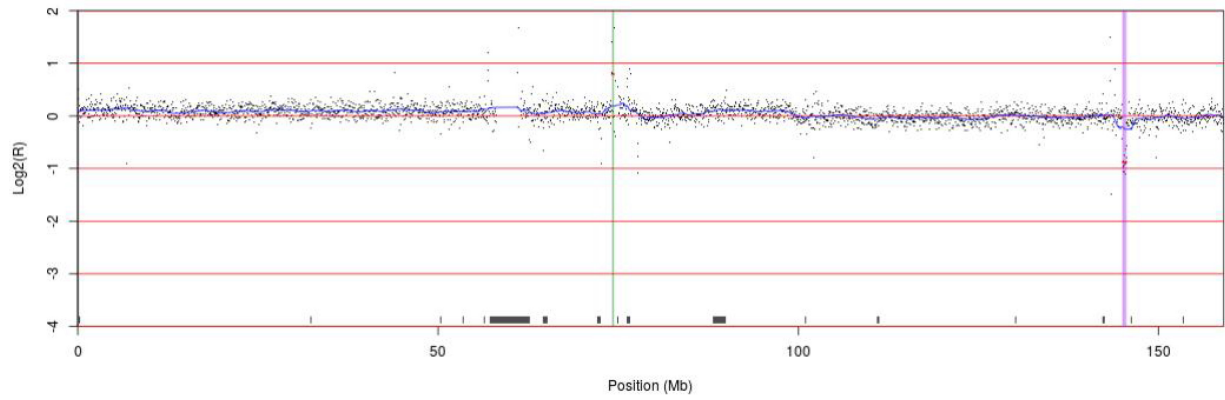

1 / 2 : LogR for Chr 8

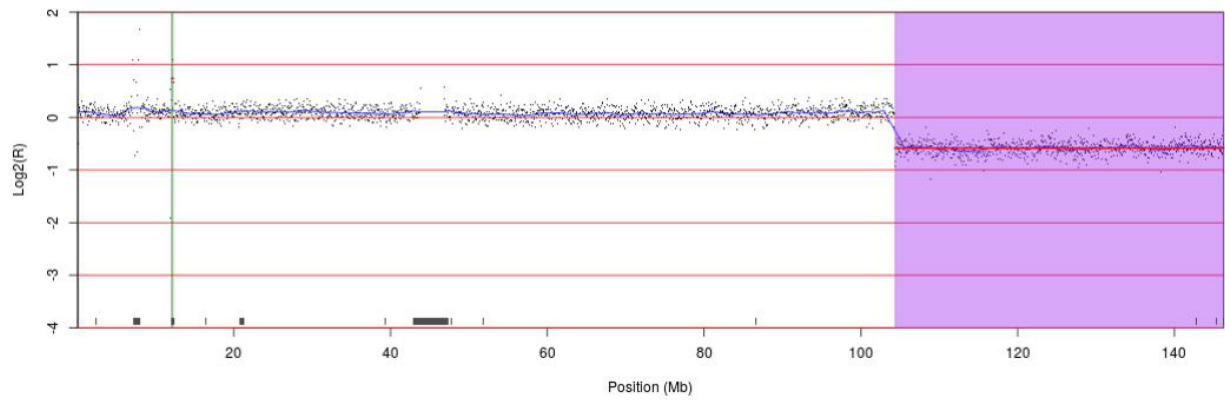

1 / 2 : LogR for Chr 9

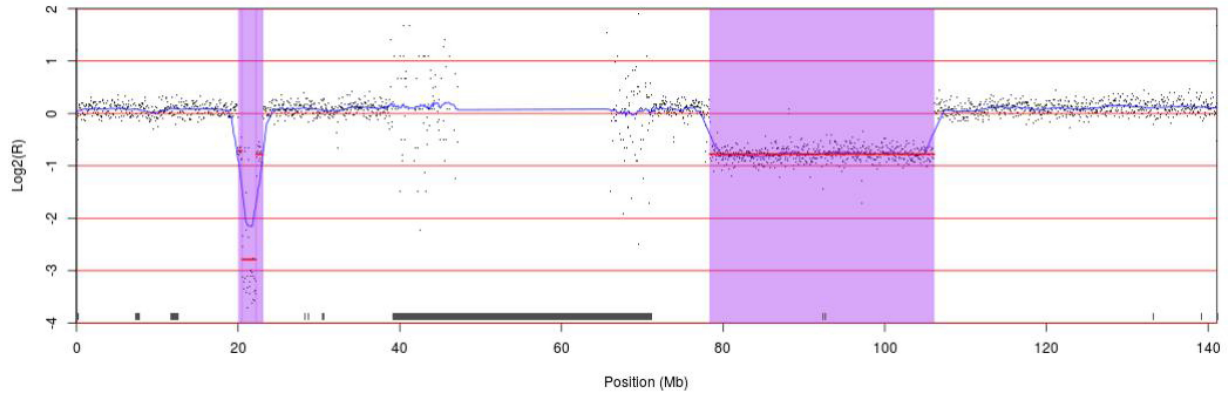

1 / 2 : LogR for Chr 10

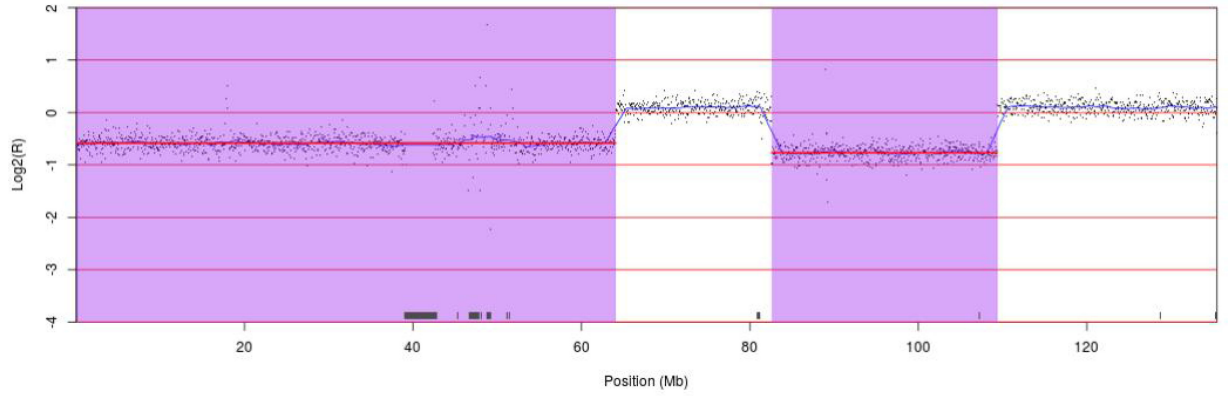

1 / 2 : LogR for Chr 11

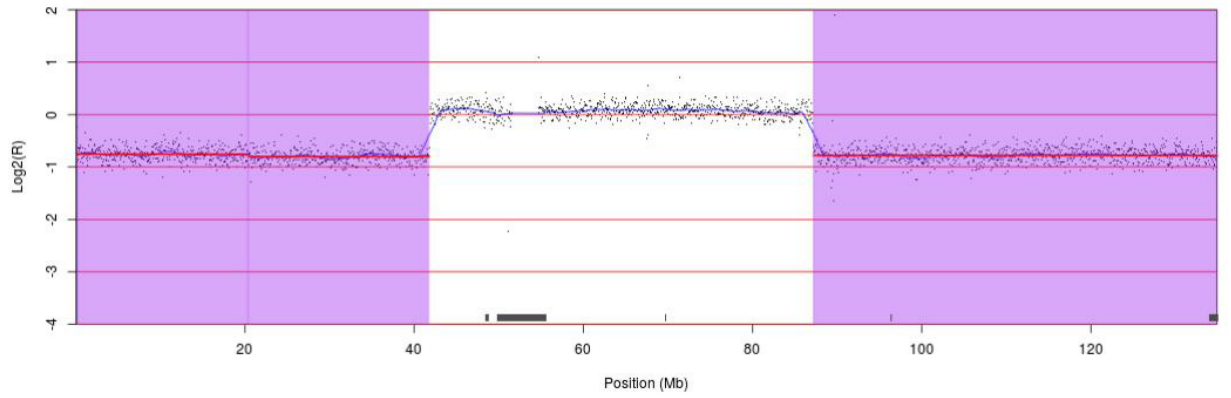

1 / 2 : LogR for Chr 12

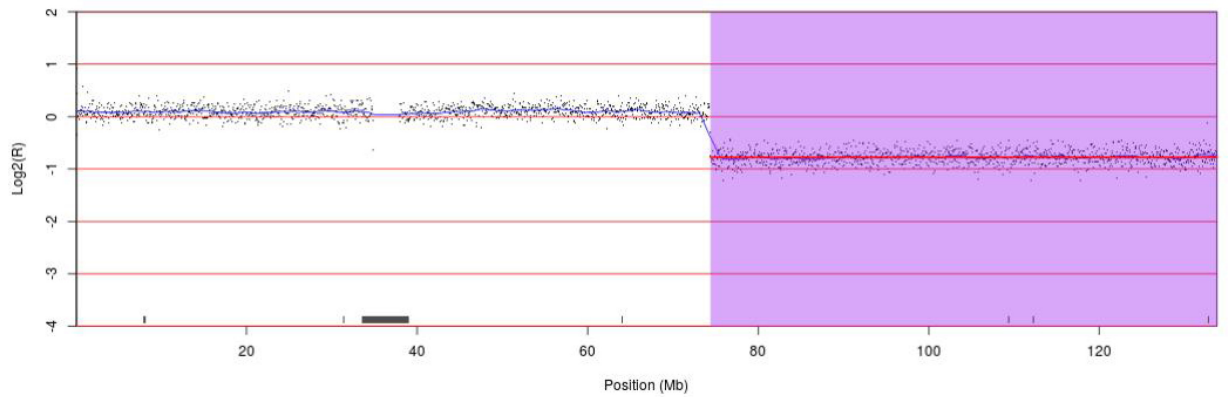

1 / 2 : LogR for Chr 13

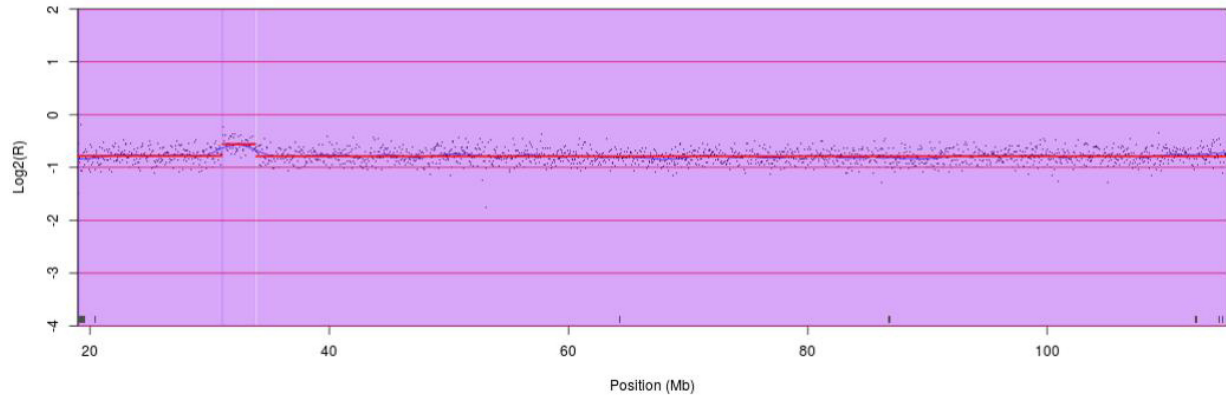

1 / 2 : LogR for Chr 14

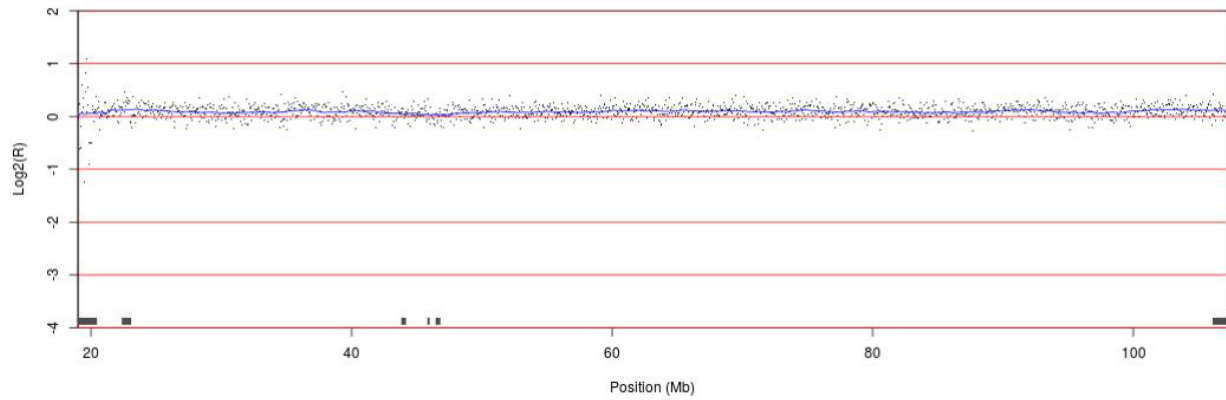

1 / 2 : LogR for Chr 15

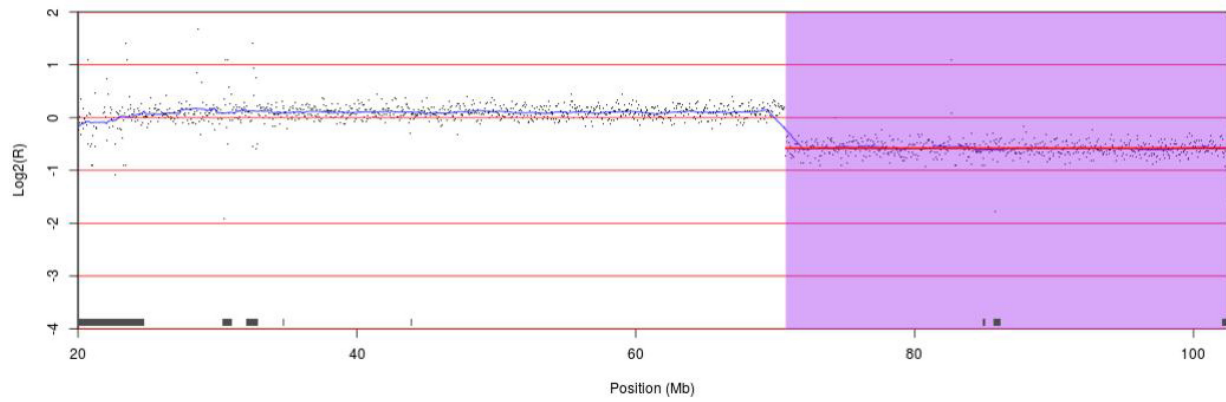

1 / 2 : LogR for Chr 16

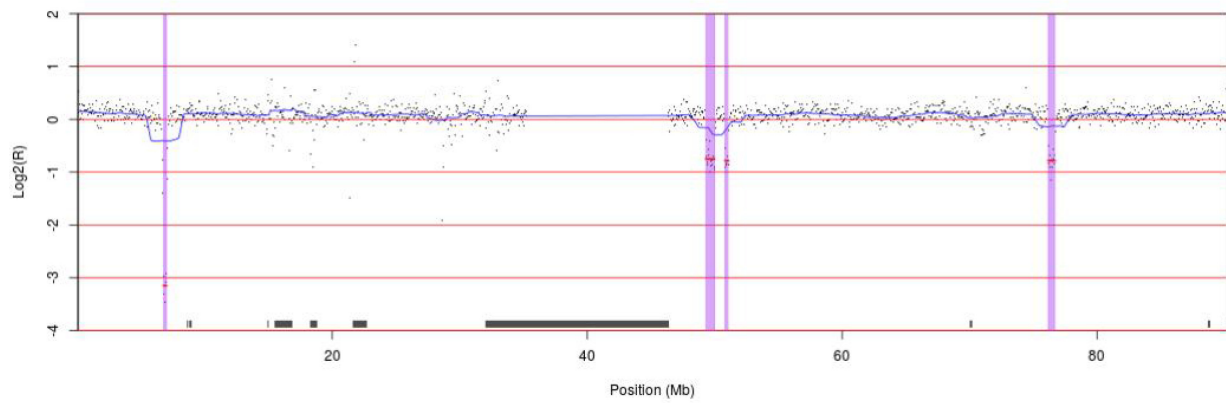

1 / 2 : LogR for Chr 17

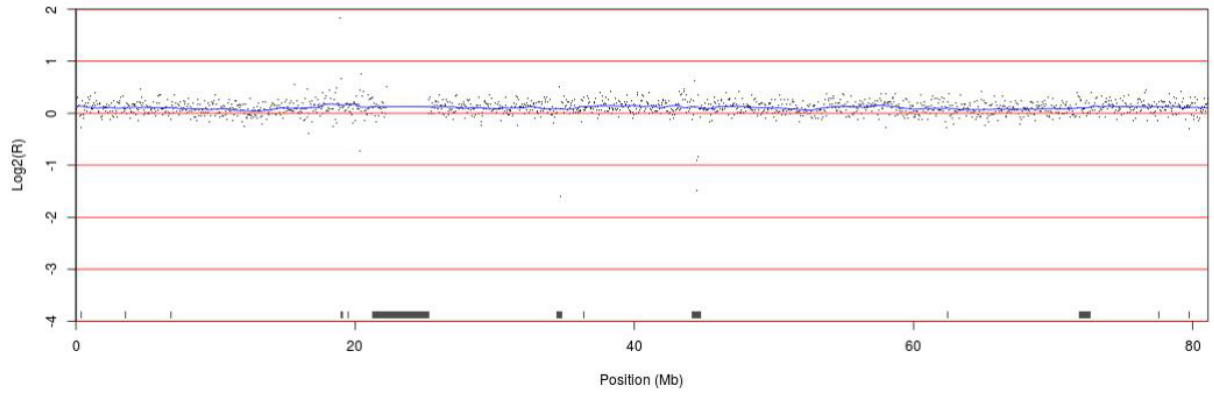

1 / 2 : LogR for Chr 18

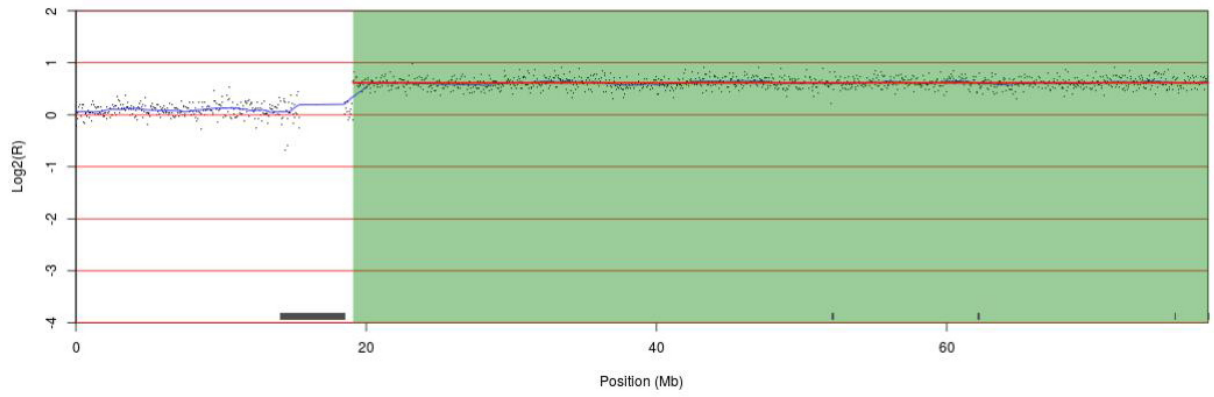

1 / 2 : LogR for Chr 19

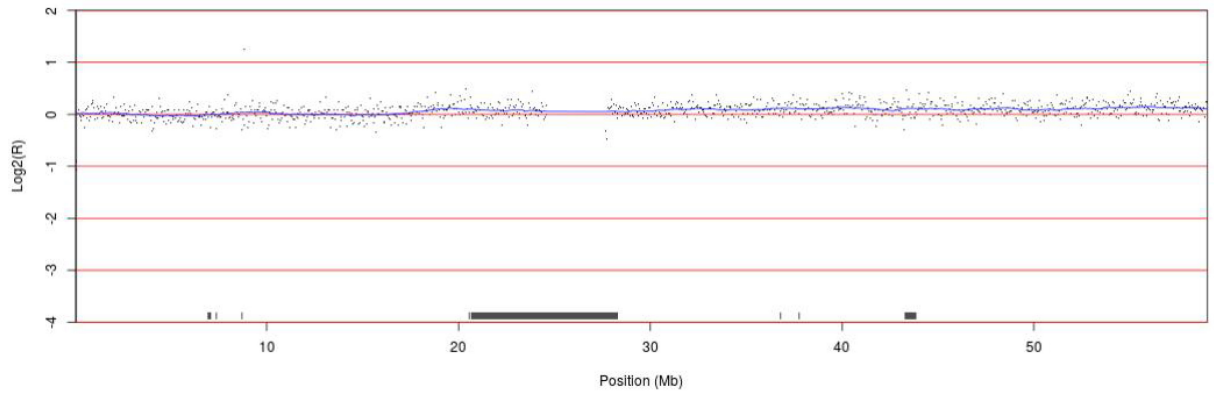

1 / 2 : LogR for Chr 20

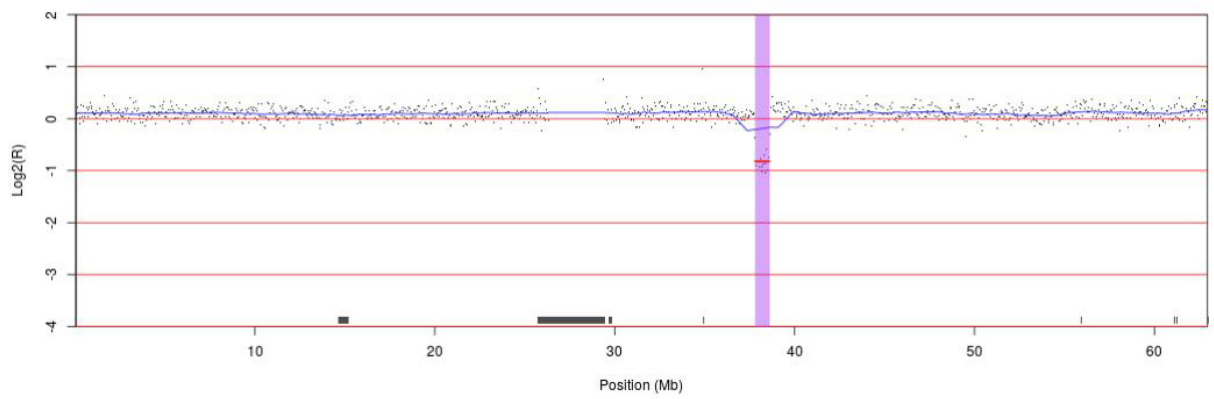

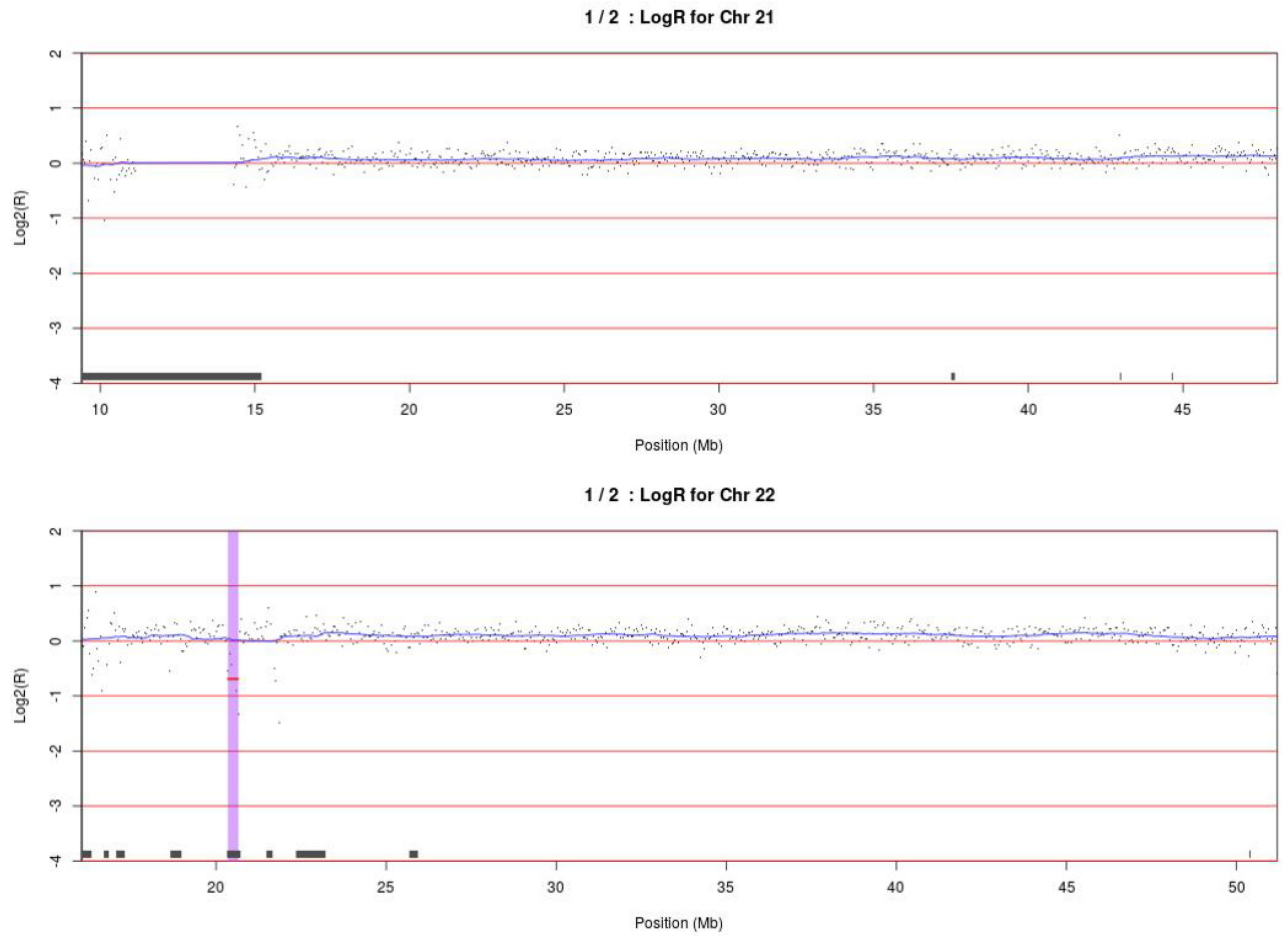

**Supplementary Figure 1: Copy number profile of a representative tumor/normal sample pair.** Log<sub>2</sub>-ratios were plotted against chromosome position.

### Chr1

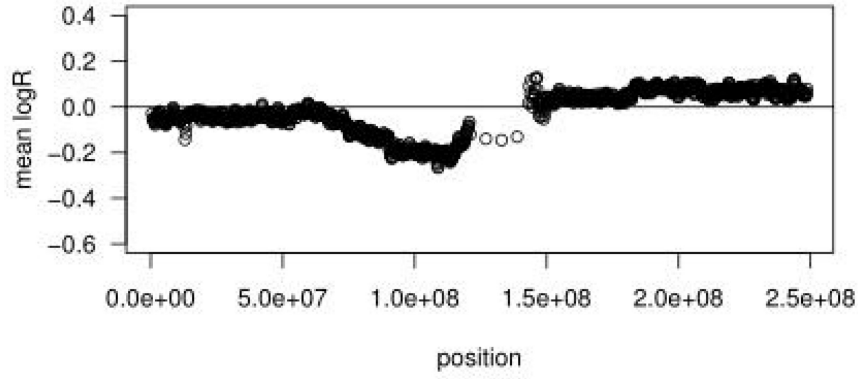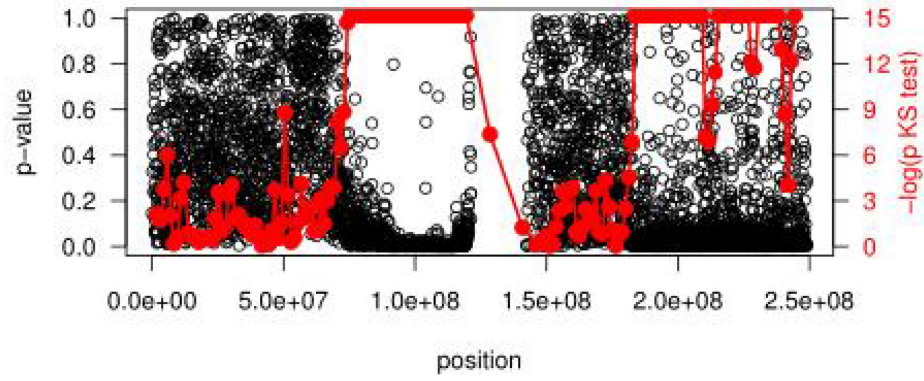

### Chr2

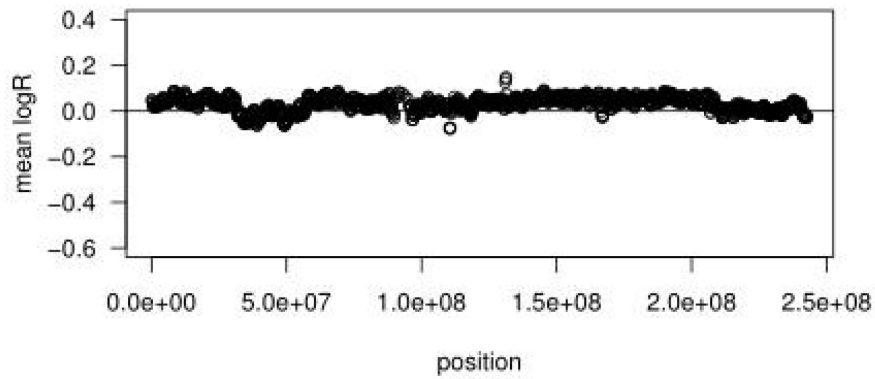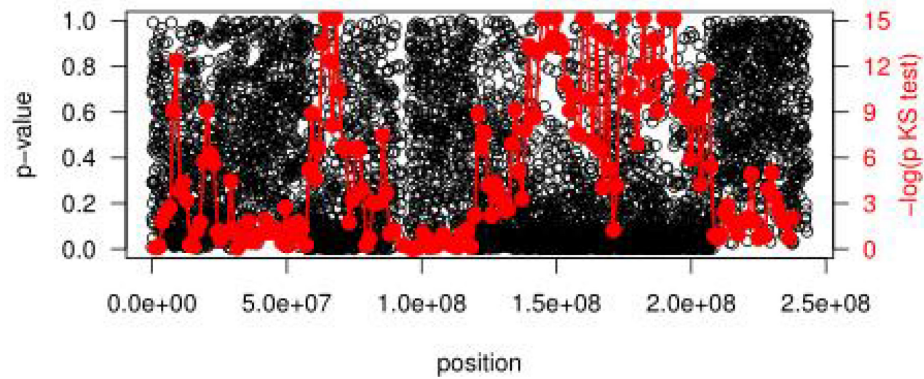

### Chr3

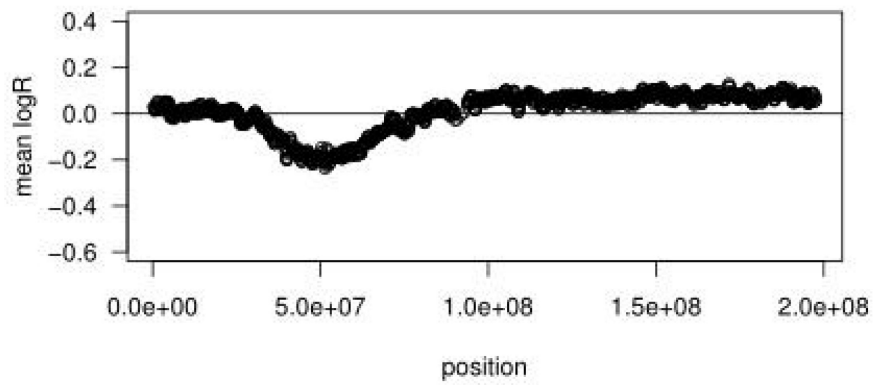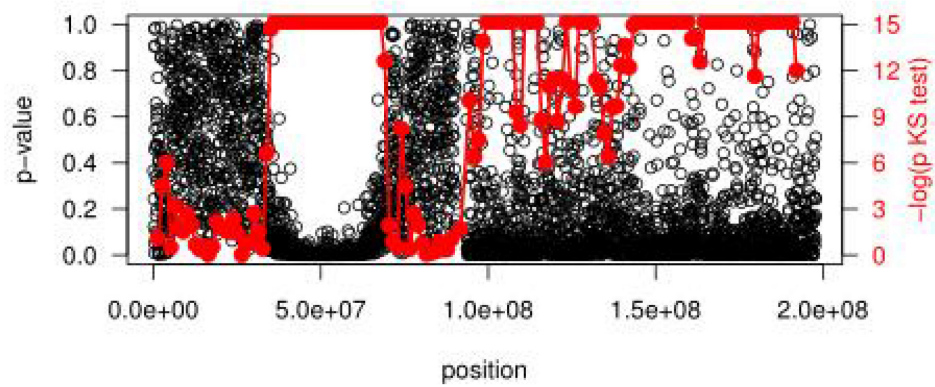

### Chr4

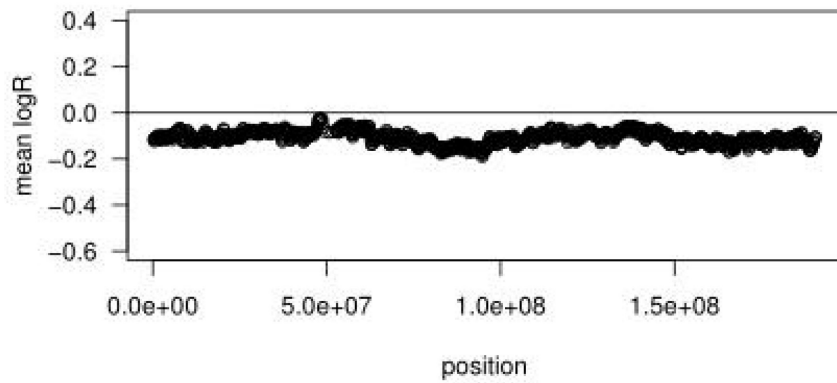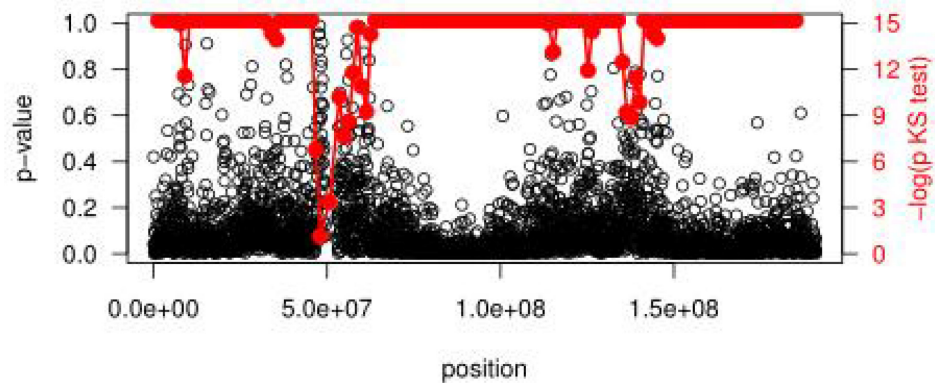



### Chr5

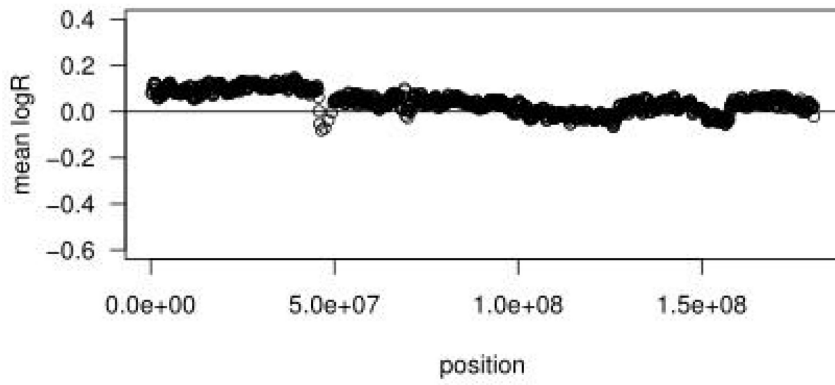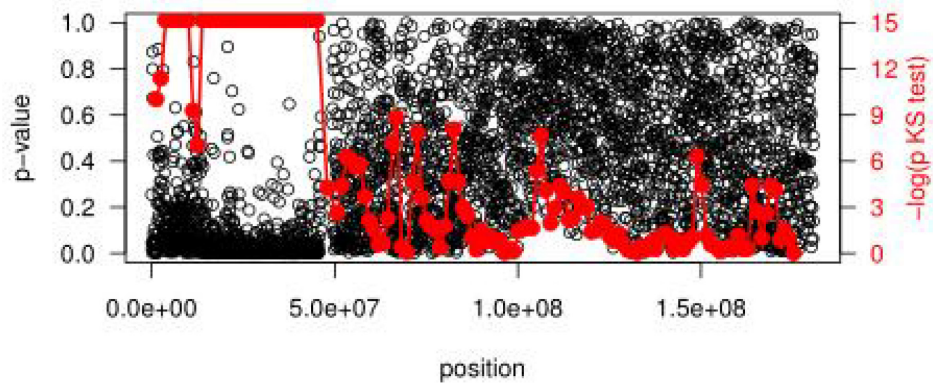

### Chr6

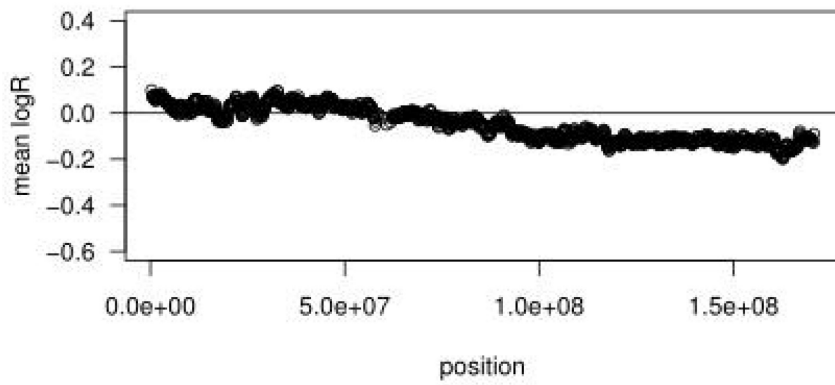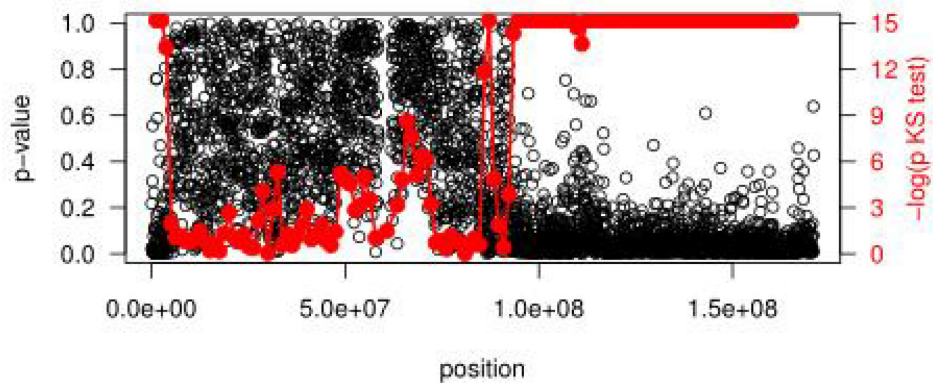



### Chr9

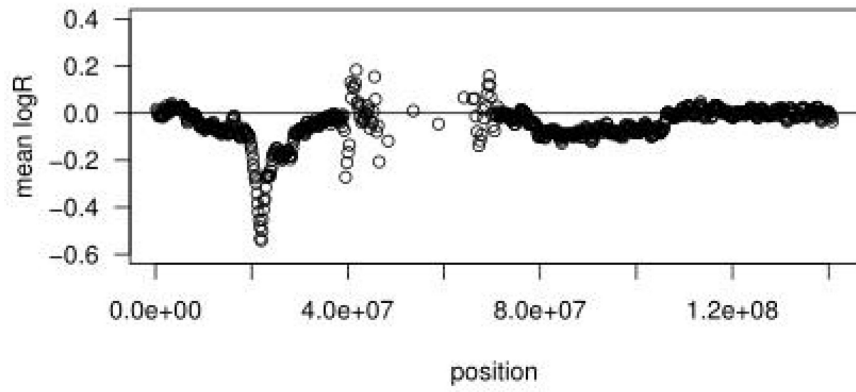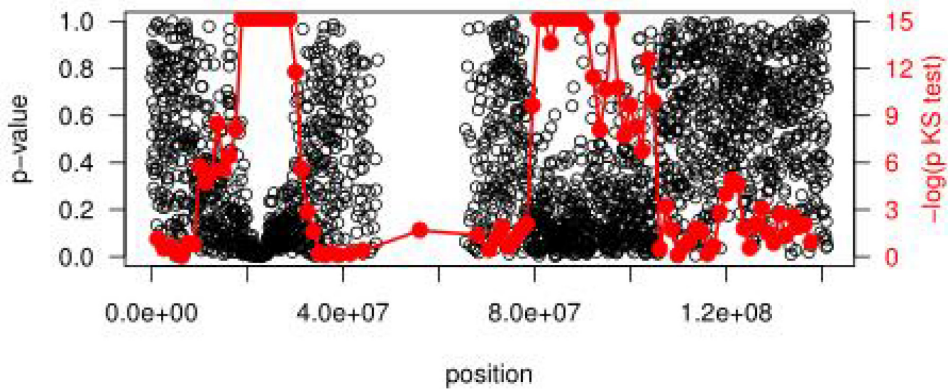

### Chr10

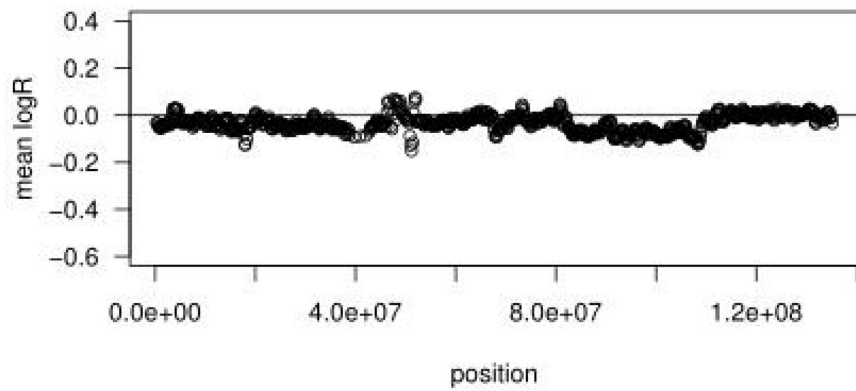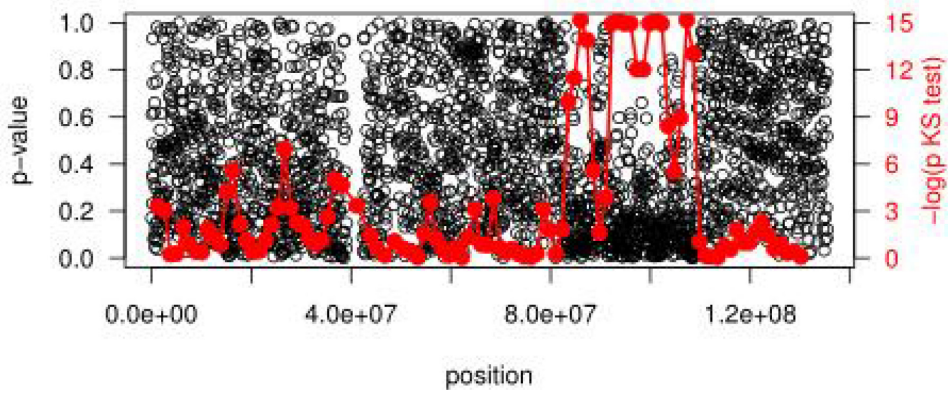

### Chr11

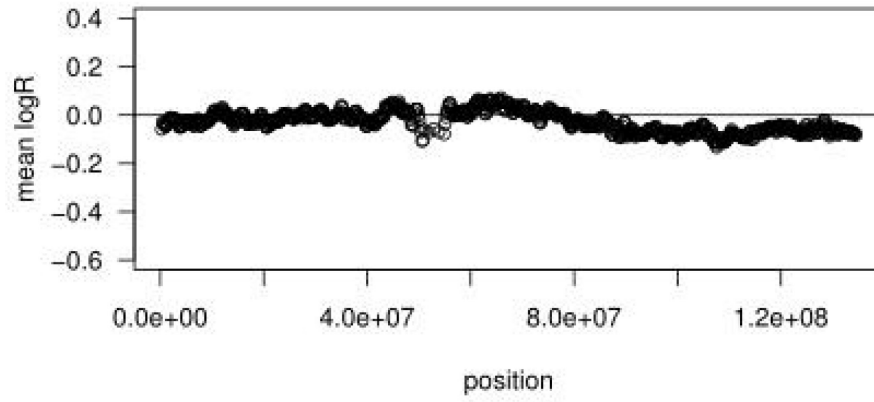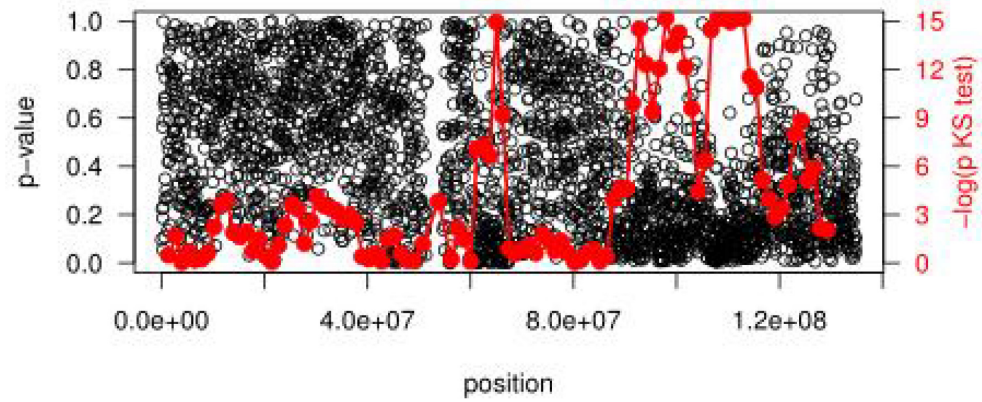

### Chr12

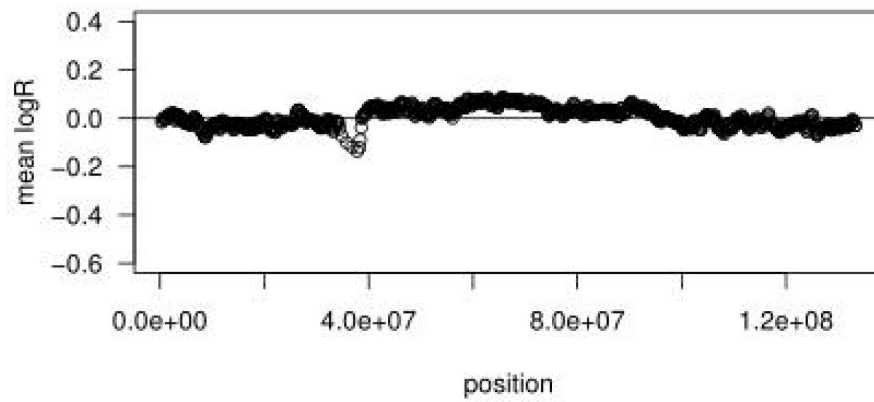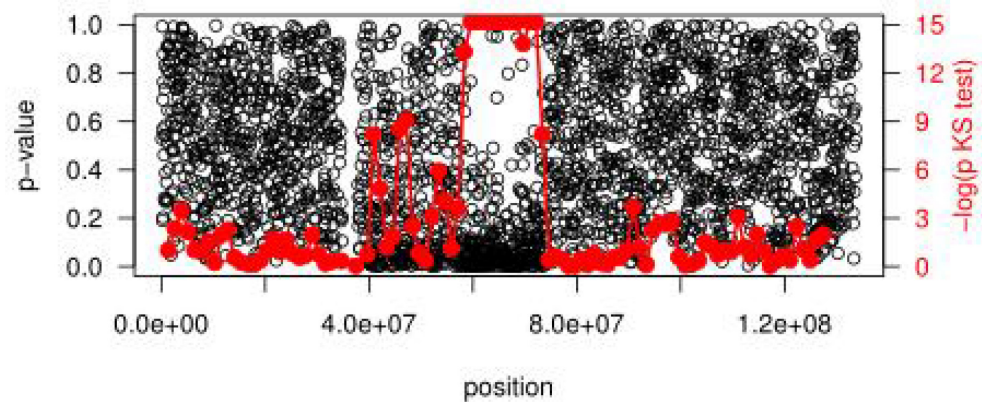

### Chr13

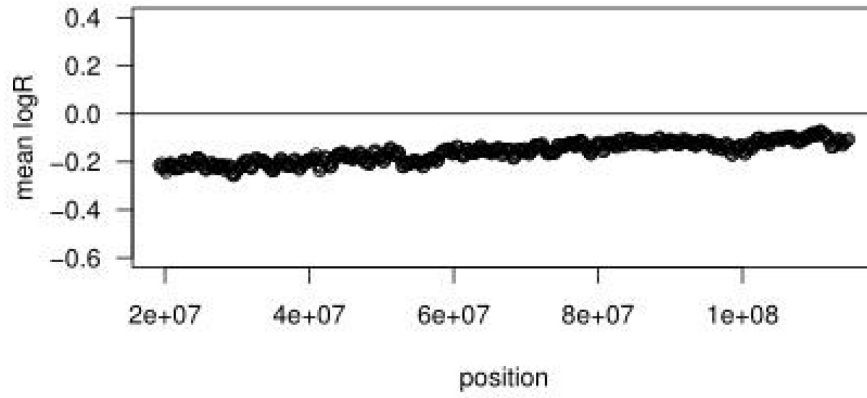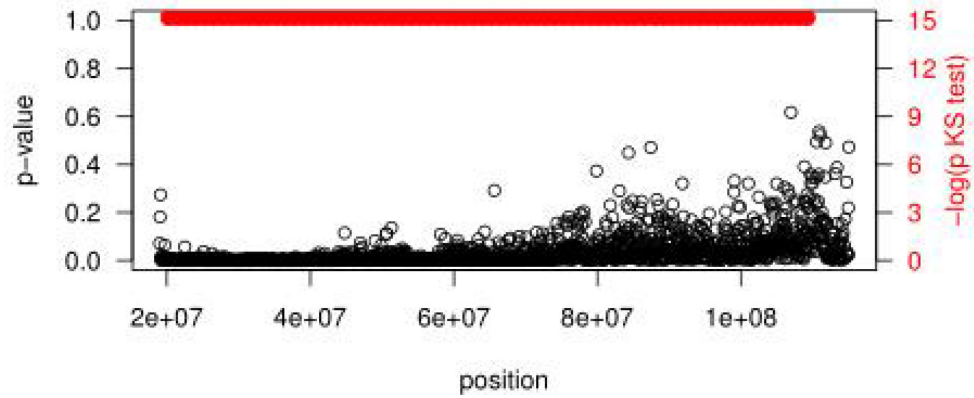

### Chr14

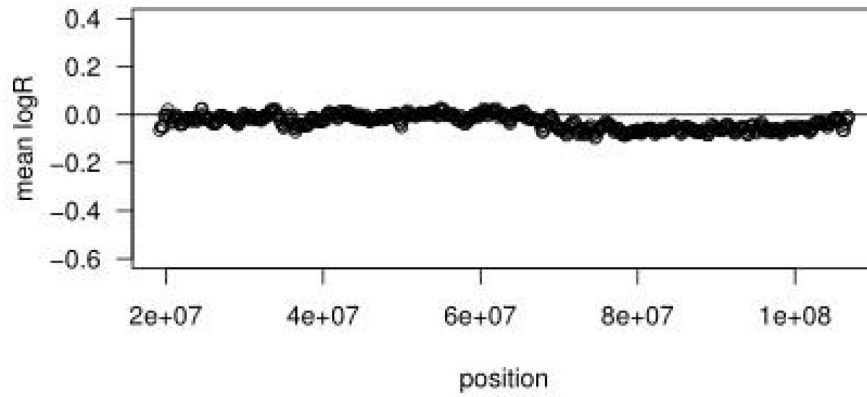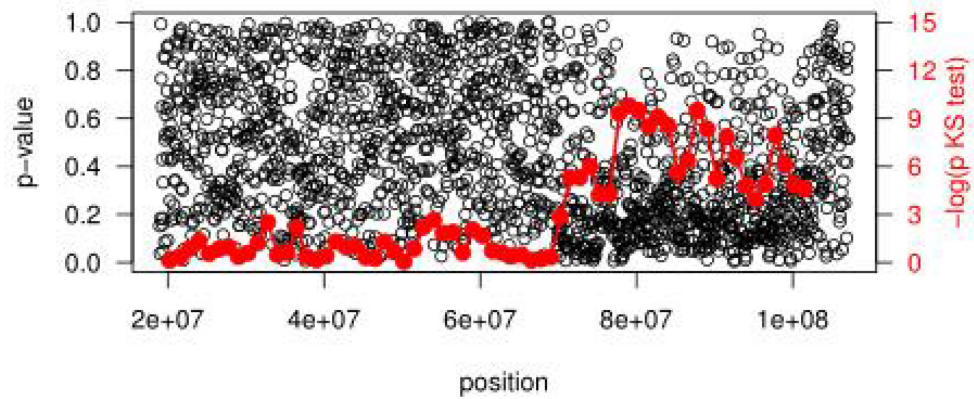

### Chr15

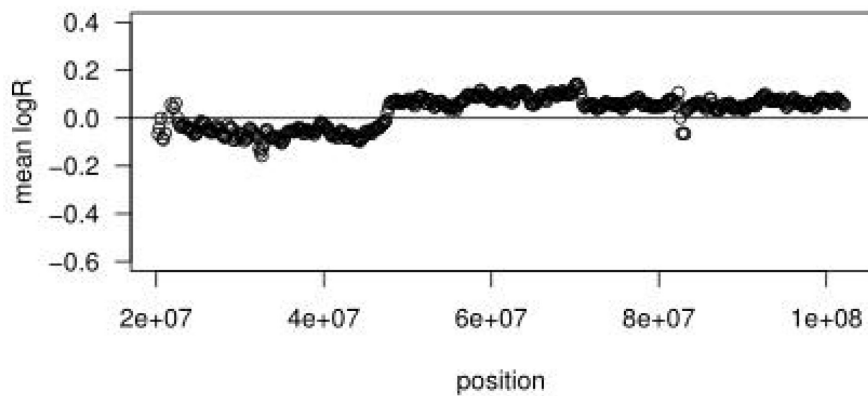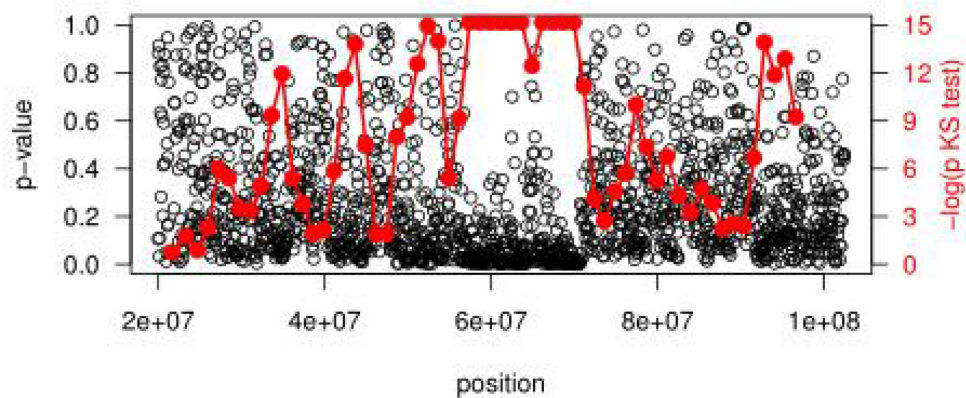

### Chr16

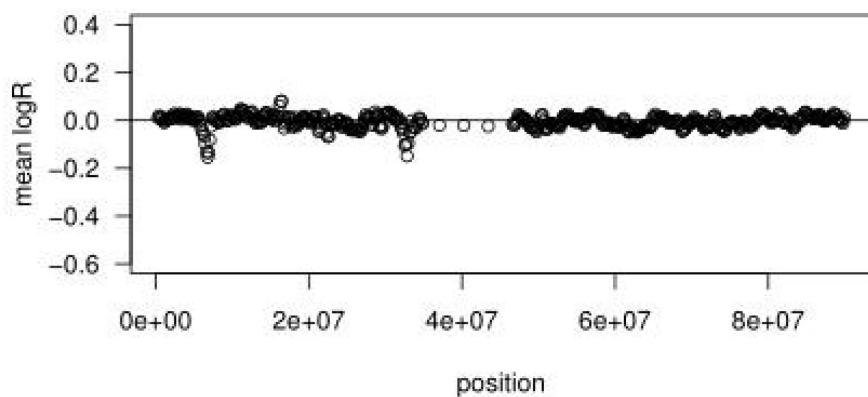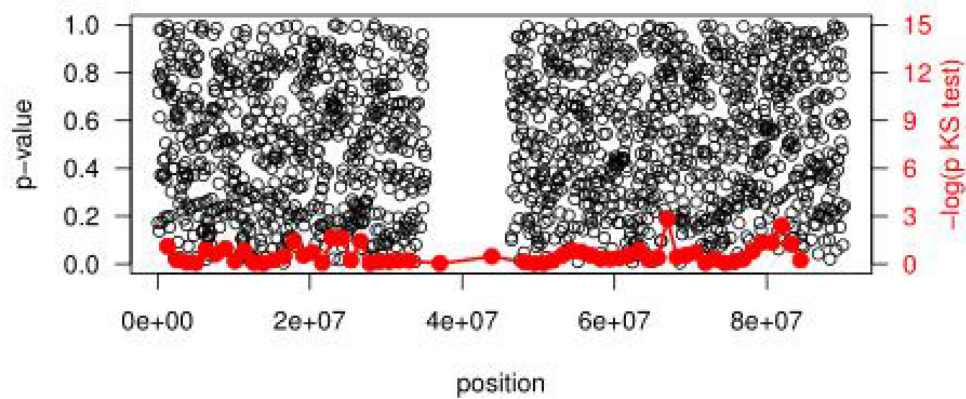

### Chr17

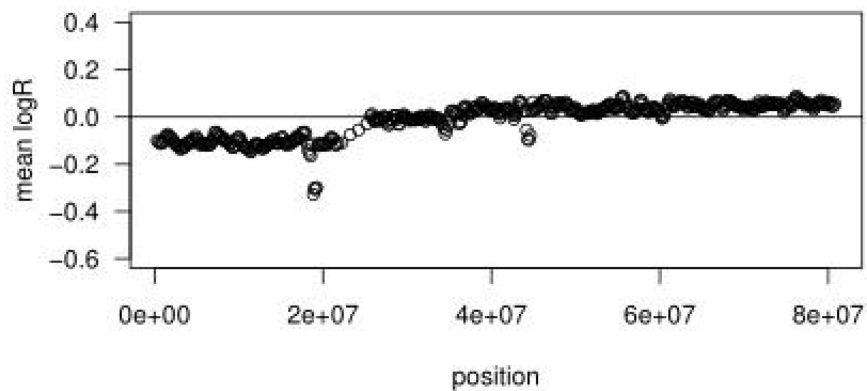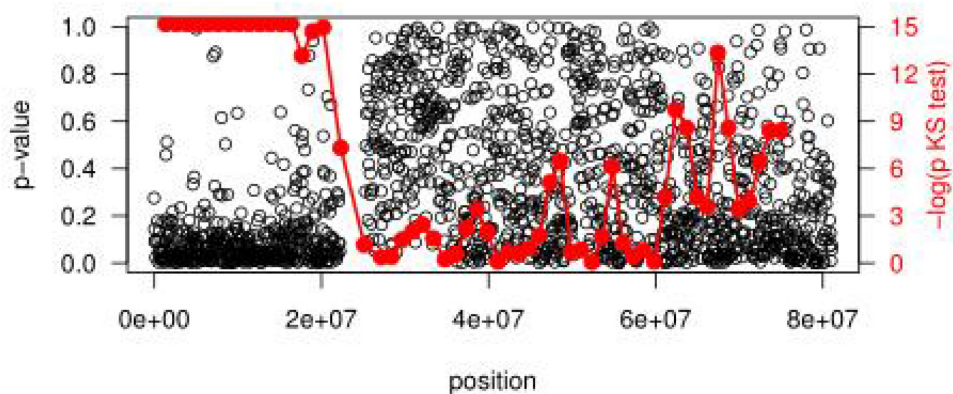

### Chr18

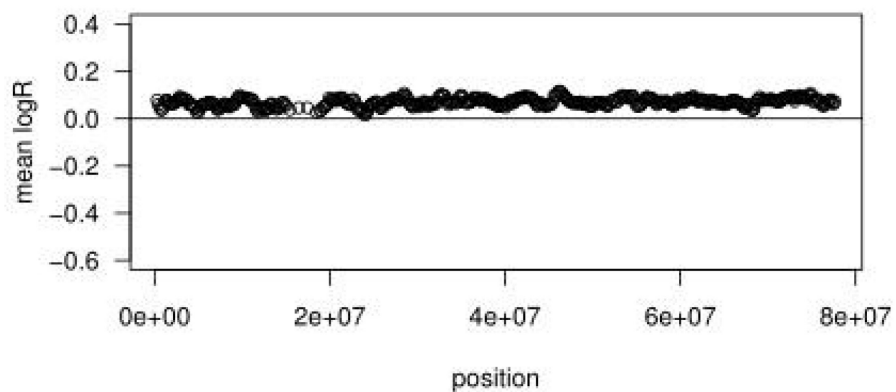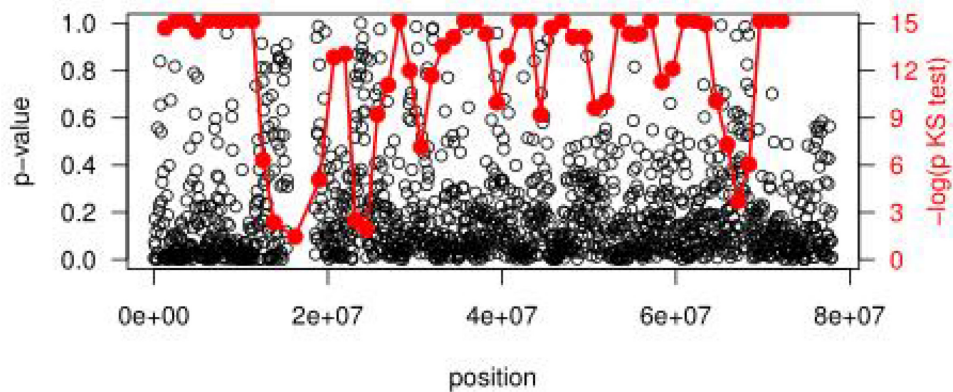

### Chr19

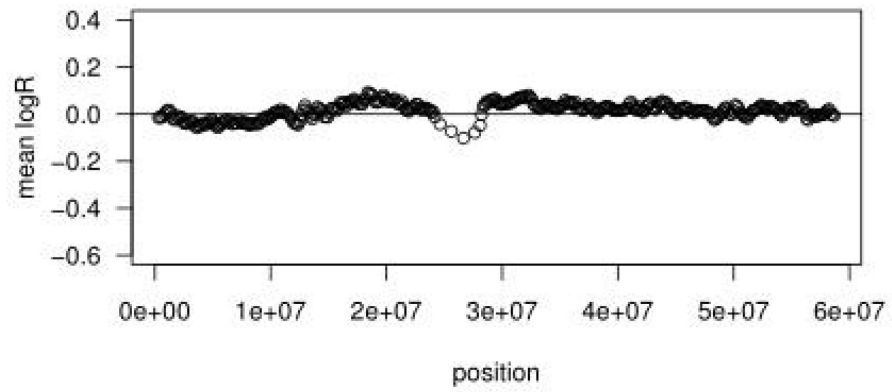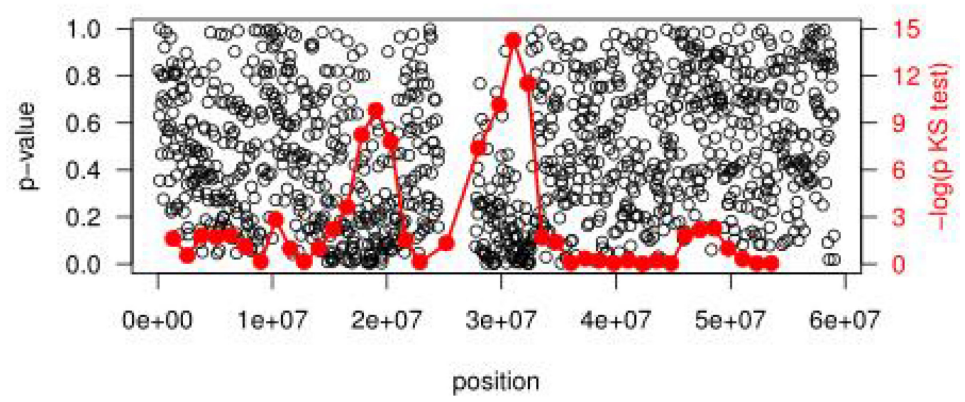

### Chr20

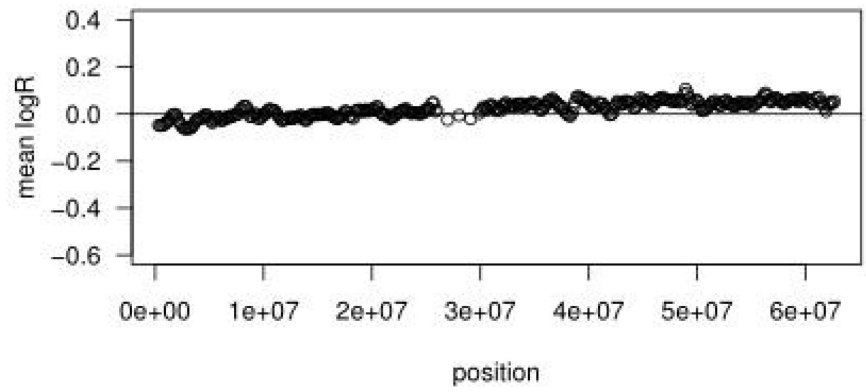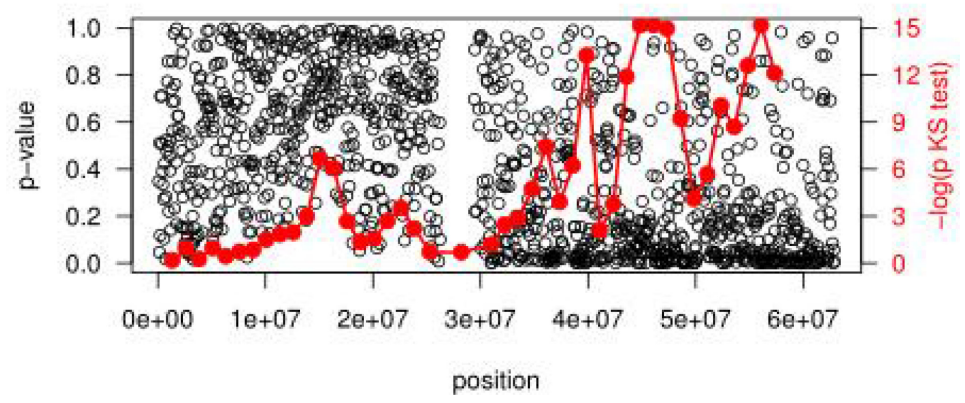



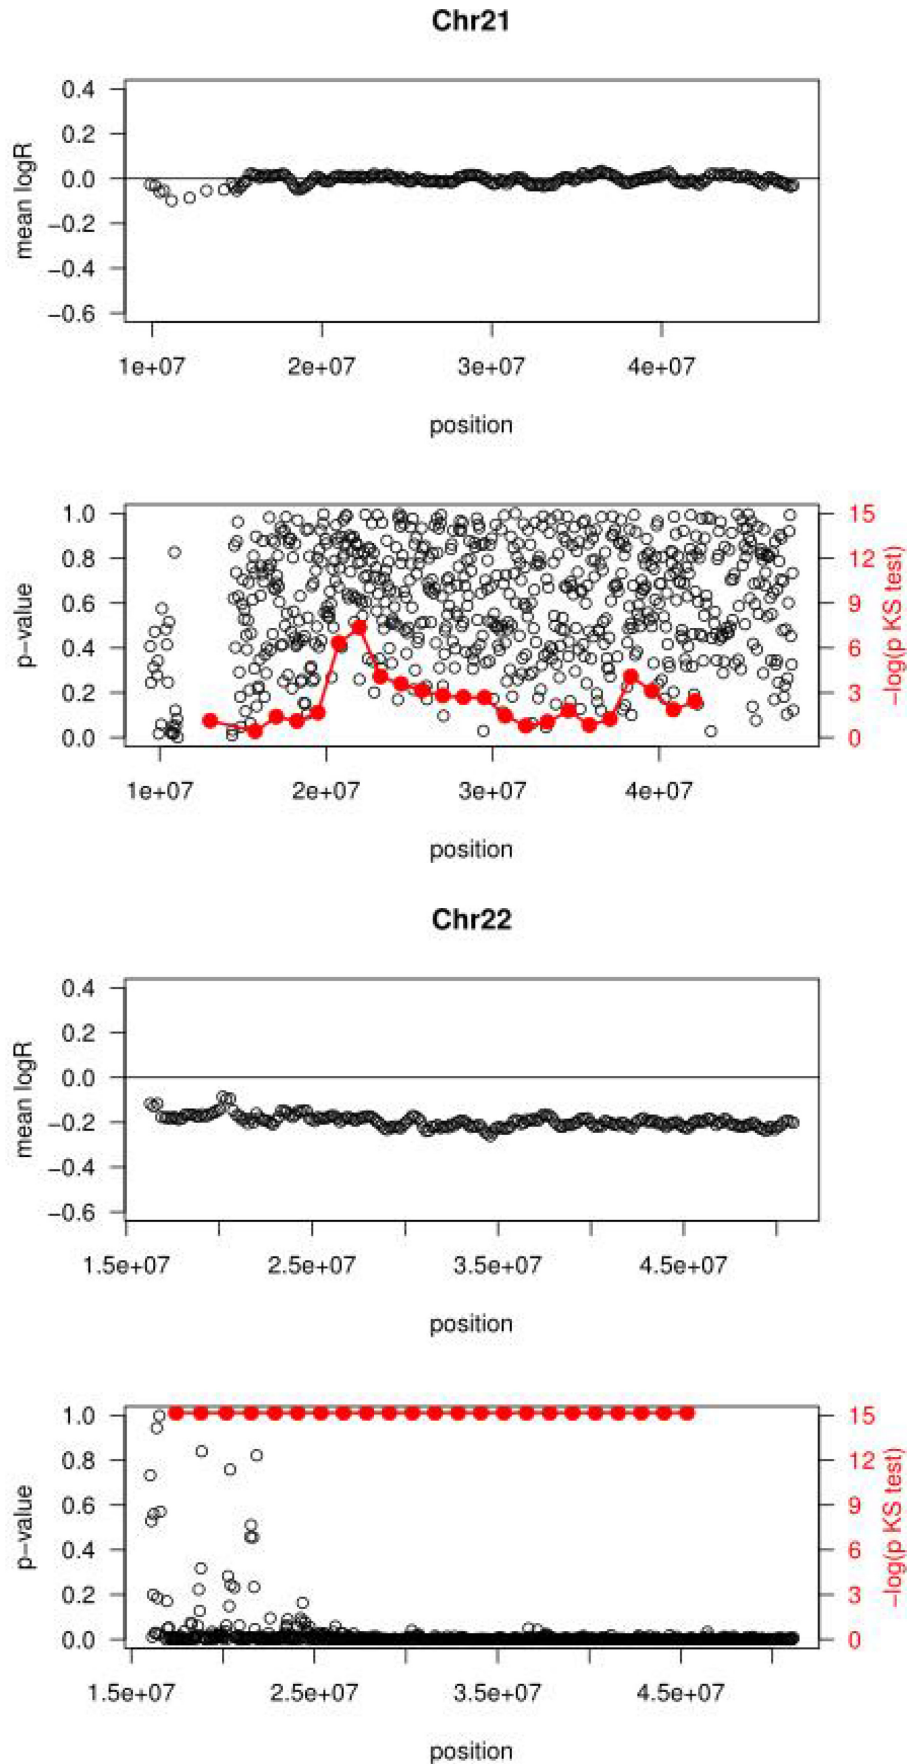

**Supplementary Figure 2: Mean copy number profile over the 21 tumor/normal sample pairs.** In the upper figures, the mean  $\log_2$ -ratio over the 21 sample pairs is plotted against chromosome position. In the lower figures, the black dots represent the  $p$ -values for the one-sample t-test for each 50 kb-bin. The red line represents the negative logarithm of the  $p$ -value of the Kolmogorov-Smirnov test.

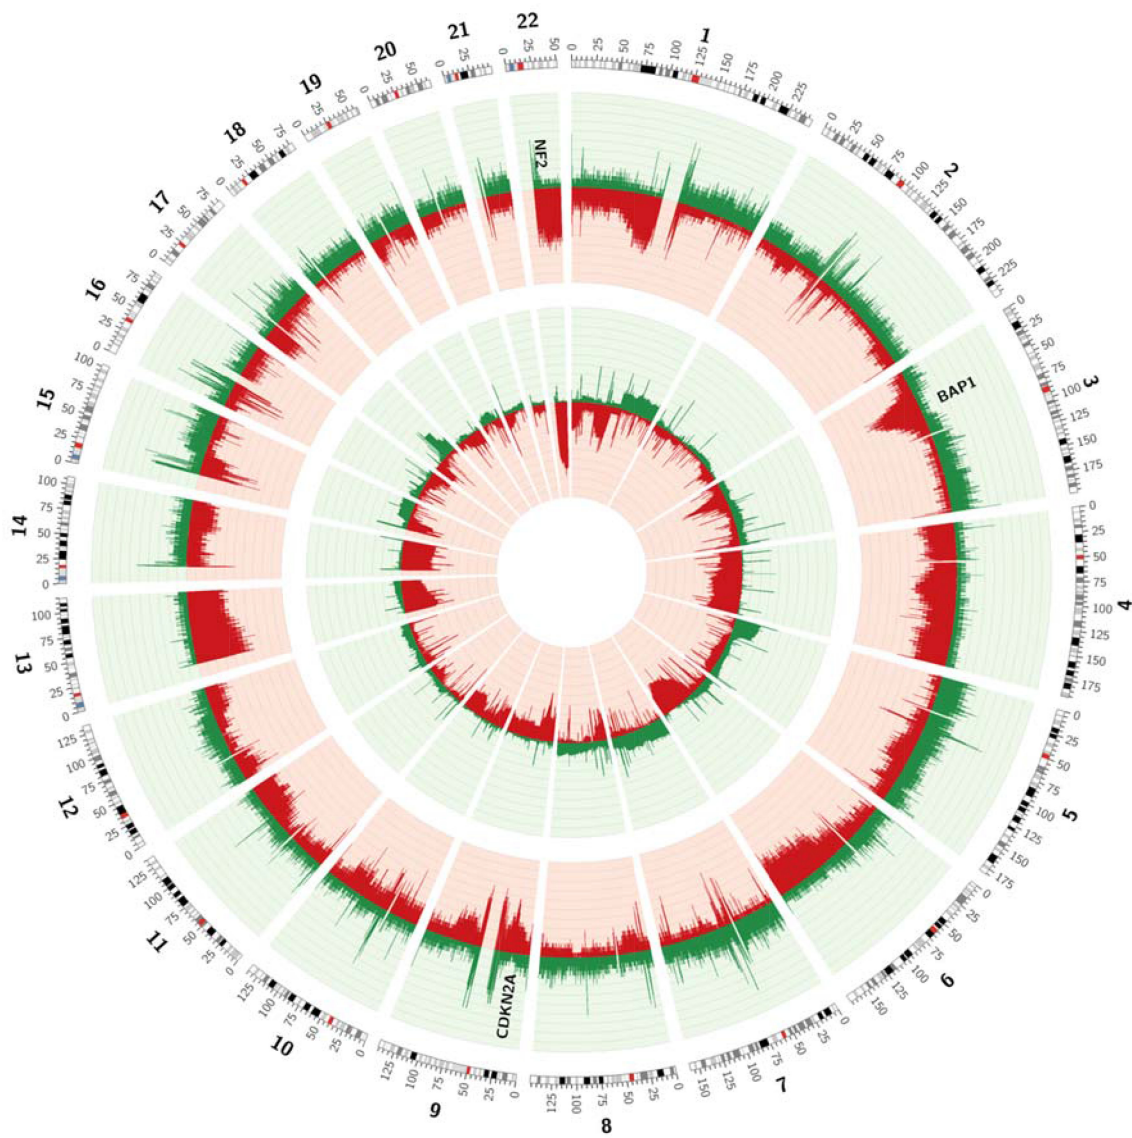

**Supplementary Figure 3: Circos plot of the copy number variations observed in low-pass whole genome data of 21 MPMs and array data of 85 MPMs.** The outer layer represents the frequency of copy number loss (red) and gain (green) in every 50 kb-bin observed in the low-pass whole genome data. The inner layer represents the frequency of copy number loss (red) and gain (green) for every chromosome position observed in the array data from TCGA.

**Supplementary Table 1: Associations between the presence of copy number loss in the ‘Cancer census genes’ most frequently lost in the TCGA-dataset and clinicopathological parameters**

| Gene name       | <i>P</i> -value for association with gender | <i>P</i> -value for association with age at diagnosis | <i>P</i> -value for association with asbestos exposure | <i>P</i> -value for association with histological diagnosis | <i>P</i> -value for association with survival |
|-----------------|---------------------------------------------|-------------------------------------------------------|--------------------------------------------------------|-------------------------------------------------------------|-----------------------------------------------|
| <i>EP300</i>    | 0.553 <sup>a</sup>                          | 0.266                                                 | 0.749 <sup>a</sup>                                     | 0.388                                                       | 1 <sup>a</sup>                                |
| <i>PDGFB</i>    | 0.803                                       | 0.423                                                 | 0.749 <sup>a</sup>                                     | 0.489                                                       | 0.740 <sup>a</sup>                            |
| <i>MKL1</i>     | 0.803                                       | 0.423                                                 | 0.749 <sup>a</sup>                                     | 0.489                                                       | 0.740 <sup>a</sup>                            |
| <i>MYH9</i>     | 0.803                                       | 0.423                                                 | 0.749 <sup>a</sup>                                     | 0.489                                                       | 0.740 <sup>a</sup>                            |
| <i>APOBEC3B</i> | 0.620                                       | 0.401                                                 | 0.529 <sup>a</sup>                                     | 0.574                                                       | 1 <sup>a</sup>                                |
| <i>ZNF278</i>   | 0.702                                       | 0.586                                                 | 0.826                                                  | 0.283                                                       | 0.524 <sup>a</sup>                            |
| <i>NF2</i>      | 0.804                                       | 0.907                                                 | 0.525 <sup>a</sup>                                     | 0.328                                                       | 0.344 <sup>a</sup>                            |
| <i>MNI</i>      | 1                                           | 0.542                                                 | 1                                                      | 0.291                                                       | 0.173 <sup>a</sup>                            |
| <i>CHEK2</i>    | 0.817                                       | 0.749                                                 | 0.773                                                  | 0.291                                                       | 0.322 <sup>a</sup>                            |
| <i>EWSR1</i>    | 0.785                                       | 0.800                                                 | 0.928                                                  | 0.361                                                       | 0.319 <sup>a</sup>                            |
| <i>BCR</i>      | 0.955                                       | 0.682                                                 | 0.677                                                  | 0.240                                                       | 0.512 <sup>a</sup>                            |
| <i>SMARCB1</i>  | 1                                           | 0.553                                                 | 0.872                                                  | 0.271                                                       | 0.340 <sup>a</sup>                            |
| <i>MAPK1</i>    | 1                                           | 0.633                                                 | 1                                                      | 0.428                                                       | 0.517 <sup>a</sup>                            |
| <i>CLTCL1</i>   | 1                                           | 1                                                     | 1                                                      | 0.623                                                       | 0.212 <sup>a</sup>                            |
| <i>SEPT5</i>    | 1                                           | 1                                                     | 1                                                      | 0.623                                                       | 0.212 <sup>a</sup>                            |
| <i>LZTR1</i>    | 1                                           | 1                                                     | 1                                                      | 0.623                                                       | 0.212 <sup>a</sup>                            |
| <i>CDKN2A</i>   | 0.822                                       | 0.557                                                 | 0.958                                                  | 0.464                                                       | <b>0.010</b>                                  |
| <i>SETD2</i>    | 0.644                                       | 0.623                                                 | 0.141                                                  | 0.549                                                       | 0.514 <sup>a</sup>                            |
| <i>BAP1</i>     | 1                                           | 0.855                                                 | 0.217                                                  | 0.945                                                       | 0.513 <sup>a</sup>                            |
| <i>NCKIPSD</i>  | 0.877                                       | 0.668                                                 | 0.134                                                  | 0.402                                                       | 0.517 <sup>a</sup>                            |
| <i>PBRM1</i>    | 0.835                                       | 0.649                                                 | 0.322                                                  | 0.945                                                       | 1 <sup>a</sup>                                |

<sup>a</sup>To identify associations, a Pearson’s Chi-squared test with Yates’ continuity correction was performed. However, when more than 20% of the cells had an expected count below five, a Fisher’s Exact test was used.

**Supplementary Table 2: Associations between the presence of copy number gain in the ‘Cancer census genes’ most frequently gained in the TCGA-dataset and clinicopathological parameters**

| Gene name      | <i>P</i> -value for association with gender | <i>P</i> -value for association with age at diagnosis | <i>P</i> -value for association with asbestos exposure | <i>P</i> -value for association with histological diagnosis | <i>P</i> -value for association with survival |
|----------------|---------------------------------------------|-------------------------------------------------------|--------------------------------------------------------|-------------------------------------------------------------|-----------------------------------------------|
| <i>TERT</i>    | 0.532 <sup>a</sup>                          | 0.074                                                 | 0.736 <sup>a</sup>                                     | 0.666                                                       | 1 <sup>a</sup>                                |
| <i>SDHA</i>    | 0.528 <sup>a</sup>                          | 0.178                                                 | 0.737 <sup>a</sup>                                     | 0.778                                                       | 1 <sup>a</sup>                                |
| <i>DROSHA</i>  | 0.514 <sup>a</sup>                          | 0.298                                                 | 0.492 <sup>a</sup>                                     | 0.909                                                       | 1 <sup>a</sup>                                |
| <i>IL7R</i>    | 0.337 <sup>a</sup>                          | 0.469                                                 | 0.719 <sup>a</sup>                                     | 1                                                           | 1 <sup>a</sup>                                |
| <i>LIFR</i>    | 0.337 <sup>a</sup>                          | 0.469                                                 | 0.719 <sup>a</sup>                                     | 1                                                           | 1 <sup>a</sup>                                |
| <i>FCGR2B</i>  | 0.721 <sup>a</sup>                          | 0.533 <sup>a</sup>                                    | 0.678 <sup>a</sup>                                     | 1 <sup>a</sup>                                              | 0.675 <sup>a</sup>                            |
| <i>CDC73</i>   | 1 <sup>a</sup>                              | 1 <sup>a</sup>                                        | 0.705 <sup>a</sup>                                     | 0.489 <sup>a</sup>                                          | 0.188 <sup>a</sup>                            |
| <i>PTPRC</i>   | 0.729 <sup>a</sup>                          | 1                                                     | 1 <sup>a</sup>                                         | 0.721                                                       | 0.110 <sup>a</sup>                            |
| <i>MDM4</i>    | 0.493 <sup>a</sup>                          | 1                                                     | 1 <sup>a</sup>                                         | 0.764 <sup>a</sup>                                          | 0.112 <sup>a</sup>                            |
| <i>ELK4</i>    | 0.729 <sup>a</sup>                          | 1                                                     | 1 <sup>a</sup>                                         | 0.721                                                       | 0.110 <sup>a</sup>                            |
| <i>SLC45A3</i> | 0.729 <sup>a</sup>                          | 1                                                     | 1 <sup>a</sup>                                         | 0.721                                                       | 0.110 <sup>a</sup>                            |
| <i>HLF</i>     | 1 <sup>a</sup>                              | 0.615                                                 | 0.435 <sup>a</sup>                                     | 0.336 <sup>a</sup>                                          | 0.431 <sup>a</sup>                            |
| <i>MSI2</i>    | 1 <sup>a</sup>                              | 0.557                                                 | 0.429 <sup>a</sup>                                     | 0.507 <sup>a</sup>                                          | 0.408 <sup>a</sup>                            |
| <i>RNF43</i>   | 1 <sup>a</sup>                              | 0.615                                                 | 0.435 <sup>a</sup>                                     | 0.336 <sup>a</sup>                                          | 0.431 <sup>a</sup>                            |
| <i>CLTC</i>    | 1 <sup>a</sup>                              | 0.615                                                 | 0.435 <sup>a</sup>                                     | 0.336 <sup>a</sup>                                          | 0.431 <sup>a</sup>                            |
| <i>PPM1D</i>   | 1 <sup>a</sup>                              | 0.615                                                 | 0.435 <sup>a</sup>                                     | 0.336 <sup>a</sup>                                          | 0.431 <sup>a</sup>                            |
| <i>BRIP1</i>   | 1 <sup>a</sup>                              | 0.585                                                 | 0.435 <sup>a</sup>                                     | 0.338 <sup>a</sup>                                          | 0.436 <sup>a</sup>                            |
| <i>CD79B</i>   | 1 <sup>a</sup>                              | 0.615                                                 | 0.435 <sup>a</sup>                                     | 0.336 <sup>a</sup>                                          | 0.431 <sup>a</sup>                            |
| <i>DDX5</i>    | 1 <sup>a</sup>                              | 0.615                                                 | 0.435 <sup>a</sup>                                     | 0.336 <sup>a</sup>                                          | 0.431 <sup>a</sup>                            |
| <i>AXIN2</i>   | 1 <sup>a</sup>                              | 0.615                                                 | 0.435 <sup>a</sup>                                     | 0.336 <sup>a</sup>                                          | 0.431 <sup>a</sup>                            |
| <i>PRKARIA</i> | 1 <sup>a</sup>                              | 0.615                                                 | 0.435 <sup>a</sup>                                     | 0.336 <sup>a</sup>                                          | 0.431 <sup>a</sup>                            |

<sup>a</sup>To identify associations, a Pearson’s Chi-squared test with Yates’ continuity correction was performed. However, when more than 20% of the cells had an expected count below five, a Fisher’s Exact test was used.

**Supplementary Table 3: Associations between the presence of copy number loss in the ‘Cancer census genes’ most frequently lost in the LP-WGS-dataset and clinicopathological parameters**

| Gene name       | <i>P</i> -value for association with gender <sup>a</sup> | <i>P</i> -value for association with age at diagnosis <sup>a</sup> | <i>P</i> -value for association with histological diagnosis <sup>a</sup> | <i>P</i> -value for association with survival <sup>a</sup> | <i>P</i> -value for association with neo-adjuvant treatment <sup>a</sup> |
|-----------------|----------------------------------------------------------|--------------------------------------------------------------------|--------------------------------------------------------------------------|------------------------------------------------------------|--------------------------------------------------------------------------|
| <i>EP300</i>    | 0.500                                                    | 0.303                                                              | 1                                                                        | 1                                                          | 0.362                                                                    |
| <i>SETD2</i>    | 0.533                                                    | 0.303                                                              | 1                                                                        | 0.530                                                      | 1                                                                        |
| <i>PBRM1</i>    | 1                                                        | 0.303                                                              | 1                                                                        | 0.530                                                      | 1                                                                        |
| <i>ROS1</i>     | 0.533                                                    | 1                                                                  | 1                                                                        | 0.517                                                      | 0.659                                                                    |
| <i>ZNF198</i>   | 1                                                        | 0.303                                                              | 1                                                                        | 0.530                                                      | 1                                                                        |
| <i>RBI</i>      | 1                                                        | 0.629                                                              | 0.521                                                                    | 0.517                                                      | 0.659                                                                    |
| <i>CHEK2</i>    | 1                                                        | 0.141                                                              | 1                                                                        | 1                                                          | 0.659                                                                    |
| <i>TRIM33</i>   | 0.133                                                    | 1                                                                  | 1                                                                        | 0.517                                                      | 1                                                                        |
| <i>CACNA1D</i>  | 1                                                        | 0.629                                                              | 1                                                                        | 0.517                                                      | 1                                                                        |
| <i>FLT3</i>     | 1                                                        | 0.629                                                              | 1                                                                        | 0.517                                                      | 1                                                                        |
| <i>FOXO1</i>    | 1                                                        | 0.350                                                              | 0.257                                                                    | 0.263                                                      | 1                                                                        |
| <i>MKL1</i>     | 1                                                        | 0.629                                                              | 1                                                                        | 0.517                                                      | 1                                                                        |
| <i>EPS15</i>    | 1                                                        | 0.350                                                              | 1                                                                        | 0.263                                                      | 0.387                                                                    |
| <i>WHSC1</i>    | 0.171                                                    | 1                                                                  | 1                                                                        | 0.263                                                      | 1                                                                        |
| <i>PTPN13</i>   | 0.171                                                    | 1                                                                  | 1                                                                        | 0.263                                                      | 1                                                                        |
| <i>RAP1GDS1</i> | 0.171                                                    | 1                                                                  | 1                                                                        | 0.263                                                      | 1                                                                        |
| <i>FBXW7</i>    | 0.171                                                    | 1                                                                  | 1                                                                        | 0.228                                                      | 0.670                                                                    |
| <i>FAT1</i>     | 0.171                                                    | 1                                                                  | 1                                                                        | 0.228                                                      | 0.670                                                                    |
| <i>NFIB</i>     | 0.171                                                    | 0.650                                                              | 1                                                                        | 0.228                                                      | 1                                                                        |
| <i>MLL3</i>     | 0.171                                                    | 1                                                                  | 0.553                                                                    | 0.263                                                      | 1                                                                        |
| <i>BRCA2</i>    | 1                                                        | 1                                                                  | 0.553                                                                    | 0.263                                                      | 0.670                                                                    |
| <i>LHFP</i>     | 1                                                        | 0.350                                                              | 1                                                                        | 0.263                                                      | 1                                                                        |
| <i>LCPI</i>     | 1                                                        | 1                                                                  | 1                                                                        | 1                                                          | 1                                                                        |
| <i>MAPK1</i>    | 1                                                        | 0.350                                                              | 0.553                                                                    | 0.263                                                      | 0.670                                                                    |

<sup>a</sup>To identify associations, a Fisher’s Exact test was performed, as for every association more than 20% of the cells had an expected count below five.

**Supplementary Table 4: Associations between the presence of copy number gain in the ‘Cancer census genes’ most frequently gained in the LP-WGS-dataset and clinicopathological parameters**

| Gene name        | <i>P</i> -value for association with gender <sup>a</sup> | <i>P</i> -value for association with age at diagnosis <sup>a</sup> | <i>P</i> -value for association with histological diagnosis <sup>a</sup> | <i>P</i> -value for association with survival <sup>a</sup> | <i>P</i> -value for association with neo-adjuvant treatment <sup>a</sup> |
|------------------|----------------------------------------------------------|--------------------------------------------------------------------|--------------------------------------------------------------------------|------------------------------------------------------------|--------------------------------------------------------------------------|
| <i>PMS2</i>      | 0.533                                                    | 0.629                                                              | 0.247                                                                    | 1                                                          | 1                                                                        |
| <i>FCGR2B</i>    | 0.429                                                    | 0.629                                                              | 1                                                                        | 1                                                          | 0.635                                                                    |
| <i>EIF4A2</i>    | 1                                                        | 0.629                                                              | 1                                                                        | 1                                                          | 0.149                                                                    |
| <i>TERT</i>      | 1                                                        | 1                                                                  | 0.128                                                                    | 0.530                                                      | 1                                                                        |
| <i>HNRNPA2B1</i> | 1                                                        | 0.582                                                              | 1                                                                        | 0.530                                                      | 0.311                                                                    |
| <i>EGFR</i>      | 1                                                        | 1                                                                  | 0.128                                                                    | 1                                                          | 1                                                                        |
| <i>MET</i>       | 1                                                        | 0.582                                                              | 0.128                                                                    | 1                                                          | 1                                                                        |
| <i>RAD21</i>     | 1                                                        | 1                                                                  | 1                                                                        | 0.155                                                      | 0.635                                                                    |
| <i>KLF6</i>      | 0.429                                                    | 1                                                                  | 0.549                                                                    | 1                                                          | 0.635                                                                    |
| <i>NAB2</i>      | 1                                                        | 0.303                                                              | 1                                                                        | 1                                                          | 0.635                                                                    |
| <i>MLL2</i>      | 0.429                                                    | 0.303                                                              | 1                                                                        | 0.530                                                      | 0.635                                                                    |
| <i>CIC</i>       | 0.429                                                    | 0.629                                                              | 0.549                                                                    | 0.155                                                      | 0.635                                                                    |
| <i>FAM131B</i>   | 1                                                        | 0.303                                                              | 1                                                                        | 0.530                                                      | 1                                                                        |
| <i>PLAG1</i>     | 1                                                        | 0.582                                                              | 1                                                                        | 0.530                                                      | 0.587                                                                    |
| <i>CHCHD7</i>    | 1                                                        | 0.582                                                              | 1                                                                        | 1                                                          | 0.311                                                                    |
| <i>RECQL4</i>    | 0.352                                                    | 0.303                                                              | 0.489                                                                    | 1                                                          | 0.311                                                                    |
| <i>NUTM2B</i>    | 1                                                        | 1                                                                  | 0.489                                                                    | 1                                                          | 1                                                                        |
| <i>NUTM2A</i>    | 1                                                        | 1                                                                  | 1                                                                        | 1                                                          | 1                                                                        |
| <i>ETNK1</i>     | 1                                                        | 1                                                                  | 1                                                                        | 0.422                                                      | 1                                                                        |
| <i>DICER1</i>    | 0.352                                                    | 1                                                                  | 0.489                                                                    | 0.530                                                      | 0.311                                                                    |
| <i>CD79B</i>     | 0.352                                                    | 0.582                                                              | 0.489                                                                    | 1                                                          | 1                                                                        |
| <i>PRKARIA</i>   | 0.352                                                    | 0.582                                                              | 0.489                                                                    | 1                                                          | 0.311                                                                    |
| <i>ZNF521</i>    | 1                                                        | 1                                                                  | 1                                                                        | 1                                                          | 1                                                                        |

<sup>a</sup>To identify associations, a Fisher’s Exact test was performed, as for every association more than 20% of the cells had an expected count below five.
